# Supplementary material for: Dynamic seasonal nitrogen cycling in response to anthropogenic N loading in a tropical catchment, Athi–Galana–Sabaki River, Kenya
Source: Copernicus journal article supplement (doi:10.5194/bg-11-443-2014), 2014-01-29
Supplement: Supplementary file 1 [file Marwick et al. (2013) Supplementary File 1.pdf › Marwick et al. (2013) Supplementary File 1.pdf]

T. R. Marwick et al. (2013) Dynamic Seasonal Nitrogen Cycling in Response to Anthropogenic N-Loading in a Tropical Catchment, Athi-Galana-Sabaki River, Kenya.

Supplementary Table 1: Overview of surface water temperature, dissolved O<sub>2</sub>, pH, conductivity, total alkalinity (TA), NH<sub>4</sub><sup>+</sup>, NO<sub>3</sub><sup>-</sup>, dissolved N<sub>2</sub>O, dissolved CH<sub>4</sub>, δ<sup>15</sup>N<sub>PN</sub>, δ<sup>18</sup>O<sub>H<sub>2</sub>O</sub>, pelagic PP, community R, TSM, POC, POC:PN and %POC for sampling sites during the dry season sampling campaign in the Athi-Galana-Sabaki catchment (note: *n.m.* = not measured).

| #            | Site Name                      | Date       | Latitude<br>(decimal) | Longitude<br>(decimal) | Altitude<br>(m) | t°<br>(°C) | O <sub>2</sub><br>(%) | pH<br>(NBS) | Conductivity<br>(μS cm <sup>-1</sup> ) | TA<br>(mmol kg <sup>-1</sup> ) | NH <sub>4</sub> <sup>+</sup><br>(μmol L <sup>-1</sup> ) | NO <sub>3</sub> <sup>-</sup><br>(μmol L <sup>-1</sup> ) |
|--------------|--------------------------------|------------|-----------------------|------------------------|-----------------|------------|-----------------------|-------------|----------------------------------------|--------------------------------|---------------------------------------------------------|---------------------------------------------------------|
| Main Channel |                                |            |                       |                        |                 |            |                       |             |                                        |                                |                                                         |                                                         |
| S1           | Athi River @ Fourteen Falls    | 28/08/2011 | -1.0776               | 37.2525                | 1410            | 20.8       | 36.1                  | 7.66        | 664                                    | 2.16                           | 1192.9                                                  | 1.9                                                     |
| S2           | Athi River @ Yatta             | 29/08/2011 | -1.2335               | 37.4660                | 1182            | 21.1       | 37.2                  | 7.25        | 612                                    | 2.76                           | 180.8                                                   | 857.6                                                   |
| S3           | Athi River @ Wamunyu           | 29/08/2011 | -1.4156               | 37.6469                | 1069            | 24.7       | 142.5                 | 9.15        | 607                                    | 2.77                           | 18.7                                                    | 778.5                                                   |
| S4           | Athi River @ Kavumbu           | 30/08/2011 | -1.6146               | 37.7853                | 941             | 25.2       | 109.9                 | 8.51        | 617                                    | 2.92                           | 17.2                                                    | 752.8                                                   |
| S5           | Athi River @ Nzeveni           | 31/08/2011 | -1.9060               | 37.9067                | 823             | 26.0       | 115.7                 | 8.68        | 621                                    | 3.01                           | 16.8                                                    | 602.1                                                   |
| S6           | Athi River @ Kiaoni            | 31/08/2011 | -2.2011               | 38.0573                | 710             | 29.1       | 119.4                 | 9.09        | 645                                    | 3.13                           | 15.6                                                    | 516.7                                                   |
| S11          | Athi River @ Tsavo Safari Camp | 4/09/2011  | -2.6697               | 38.3821                | 493             | 26.8       | 142.0                 | 9.53        | 721                                    | 3.87                           | 19.1                                                    | 196.1                                                   |
| S13          | Athi River @ Pattersons Lodge  | 5/09/2011  | -2.9425               | 38.4890                | 447             | 24.3       | 154.2                 | 9.81        | 728                                    | 4.05                           | 16.9                                                    | 1.7                                                     |
| S14          | Galana River @ Luggard Falls   | 5/09/2011  | -3.0403               | 38.6961                | 333             | 29.5       | 118.9                 | 9.61        | 629                                    | 3.90                           | 15.1                                                    | 1.1                                                     |
| S15          | Galana River @ Hippo Point     | 6/09/2011  | -3.0464               | 38.9055                | 232             | 28.5       | 113.8                 | 9.43        | 710                                    | 4.53                           | 18.1                                                    | 1.1                                                     |
| S16          | Galana River @ Sala            | 6/09/2011  | -3.0763               | 39.1699                | 171             | 28.8       | 124.9                 | 9.50        | 702                                    | 3.73                           | 17.0                                                    | 0.2                                                     |
| S17          | Galana River @ Kiboko Lodge    | 7/09/2011  | -3.0689               | 39.2944                | 140             | 27.7       | 123.5                 | 9.33        | 756                                    | 4.29                           | 15.9                                                    | 0.4                                                     |
| S18          | Galana River @ Chakahola       | 7/09/2011  | -3.1062               | 39.5539                | 76              | 30.9       | 122.9                 | 9.19        | 772                                    | 4.36                           | 14.8                                                    | 0.5                                                     |
| S19          | Galana River @ Kakoneni        | 8/09/2011  | -3.1429               | 39.8518                | 36              | 30.8       | 123.5                 | 9.03        | 811                                    | 4.64                           | 15.1                                                    | 2.1                                                     |
| S20          | Sabaki River                   | 10/09/2011 | -3.1443               | 40.1084                | 0               | 31.9       | 136.8                 | 9.03        | 864                                    | 4.97                           | 13.8                                                    | 2.4                                                     |
| Tributaries  |                                |            |                       |                        |                 |            |                       |             |                                        |                                |                                                         |                                                         |
| S7           | Mzima Spring                   | 2/09/2011  | -2.9842               | 38.0231                | 693             | 24.6       | 93.6                  | 7.74        | 547                                    | 4.82                           | 19.4                                                    | 46.1                                                    |
| S8           | Mzima River                    | 2/09/2011  | -3.0155               | 38.0288                | 656             | 24.7       | 102.0                 | 8.38        | 521                                    | 4.61                           | 19.9                                                    | 39.9                                                    |
| S9           | Ziwani River                   | 3/09/2011  | -3.0256               | 38.0408                | 653             | 22.9       | 105.7                 | 8.96        | 957                                    | 8.60                           | 19.8                                                    | 37.0                                                    |
| S10          | Tsavo River (Tsavo West)       | 3/09/2011  | -3.0463               | 38.1038                | 620             | 24.5       | 103.1                 | 8.63        | 584                                    | 5.20                           | 19.9                                                    | 37.7                                                    |
| S12          | Tsavo River @ Mombassa Rd      | 4/09/2011  | -2.9946               | 38.4608                | 466             | 26.8       | 103.2                 | 8.86        | 633                                    | 5.29                           | 18.8                                                    | 37.7                                                    |

Supplementary Table 1 (cont.)

| #            | Site Name                      | Date       | N <sub>2</sub> O<br>(nmol L <sup>-1</sup> ) | CH <sub>4</sub><br>(nmol L <sup>-1</sup> ) | δ <sup>15</sup> N <sub>PN</sub><br>(‰) | δ <sup>18</sup> O <sub>H<sub>2</sub>O</sub><br>(‰) | Pelagic PP<br>(μmol L <sup>-1</sup> h <sup>-1</sup> ) | Community R<br>(μmol L <sup>-1</sup> h <sup>-1</sup> ) | TSM<br>(mg L <sup>-1</sup> ) | POC<br>(mg L <sup>-1</sup> ) | POC:PN<br>(-) | %POC<br>(-) |
|--------------|--------------------------------|------------|---------------------------------------------|--------------------------------------------|----------------------------------------|----------------------------------------------------|-------------------------------------------------------|--------------------------------------------------------|------------------------------|------------------------------|---------------|-------------|
| Main Channel |                                |            |                                             |                                            |                                        |                                                    |                                                       |                                                        |                              |                              |               |             |
| S1           | Athi River @ Fourteen Falls    | 28/08/2011 | 17.5                                        | 3765.5                                     | 3.1                                    | -3.9                                               | 39.39 ± 3.42                                          | 2.75 ± 0.13                                            | 54.8                         | 17.3                         | 5.3           | 31.5        |
| S2           | Athi River @ Yatta             | 29/08/2011 | 195.9                                       | 335.7                                      | 13.9                                   | -3.7                                               | 2.39 ± 0.01                                           | 1.49 ± 0.26                                            | 15.3                         | 3.9                          | 6.0           | 25.8        |
| S3           | Athi River @ Wamunyu           | 29/08/2011 | 17.8                                        | 83.8                                       | 19.3                                   | -2.7                                               | 3.67 ± 0.25                                           | 1.21 ± 0.07                                            | 18.4                         | 3.3                          | 8.0           | 17.8        |
| S4           | Athi River @ Kavumbu           | 30/08/2011 | 15.0                                        | 142.3                                      | 18.7                                   | -2.7                                               | 10.08 ± 0.28                                          | 0.79 ± 0.07                                            | 24.6                         | 3.0                          | 7.7           | 12.1        |
| S5           | Athi River @ Nzeveni           | 31/08/2011 | 13.4                                        | 176.3                                      | 18.6                                   | -2.1                                               | 11.02 ± 1.49                                          | 2.11 ± 0.14                                            | 47.1                         | 3.2                          | 6.8           | 6.8         |
| S6           | Athi River @ Kiaoni            | 31/08/2011 | 9.5                                         | 200.5                                      | 20.4                                   | -1.7                                               | 24.64 ± 0.52                                          | 2.65 ± 0.11                                            | 42.6                         | 4.0                          | 7.2           | 9.3         |
| S11          | Athi River @ Tsavo Safari Camp | 4/09/2011  | 7.6                                         | 81.1                                       | 25.9                                   | -0.8                                               | 91.56 ± 2.39                                          | 8.45 ± 2.80                                            | 50.3                         | 12.2                         | 6.6           | 24.2        |
| S13          | Athi River @ Pattersons Lodge  | 5/09/2011  | 8.2                                         | 166.4                                      | 31.5                                   | -0.3                                               | 180.00 ± 61.33                                        | 12.95 ± 0.70                                           | 67.3                         | 20.3                         | 6.5           | 30.2        |
| S14          | Galana River @ Luggard Falls   | 5/09/2011  | 6.5                                         | 80.1                                       | 24.2                                   | -0.8                                               | 131.46 ± 11.56                                        | 8.51 ± 0.09                                            | 131.6                        | 21.2                         | 10.5          | 16.1        |
| S15          | Galana River @ Hippo Point     | 6/09/2011  | 8.1                                         | 116.1                                      | 23.2                                   | -3.9                                               | <i>n.m.</i>                                           | 9.39 ± 0.65                                            | 160.4                        | 23.2                         | 9.7           | 14.5        |
| S16          | Galana River @ Sala            | 6/09/2011  | 6.7                                         | 466.1                                      | 22.6                                   | -2.3                                               | 95.91 ± 6.91                                          | 9.58 ± 0.20                                            | 136.7                        | 36.3                         | 11.7          | 26.6        |
| S17          | Galana River @ Kiboko Lodge    | 7/09/2011  | 6.9                                         | 259.0                                      | 21.5                                   | -0.4                                               | 92.98 ± 4.50                                          | 9.71 ± 0.80                                            | 242.5                        | 32.9                         | 11.9          | 13.6        |
| S18          | Galana River @ Chakahola       | 7/09/2011  | 6.0                                         | 840.1                                      | 20.5                                   | 0.1                                                | 64.11 ± 2.83                                          | 8.36 ± 0.15                                            | 203.0                        | 32.0                         | 12.4          | 15.7        |
| S19          | Galana River @ Kakoneni        | 8/09/2011  | 6.0                                         | 716.3                                      | 18.9                                   | 0.6                                                | 66.14 ± 6.71                                          | 9.50 ± 0.56                                            | 168.5                        | 27.5                         | 11.6          | 16.3        |
| S20          | Sabaki River                   | 10/09/2011 | 6.3                                         | 1092.0                                     | 17.0                                   | 0.2                                                | 48.79 ± 4.55                                          | 6.17 ± 0.75                                            | 143.5                        | 16.2                         | 12.2          | 11.3        |
| Tributaries  |                                |            |                                             |                                            |                                        |                                                    |                                                       |                                                        |                              |                              |               |             |
| S7           | Mzima Spring                   | 2/09/2011  | 8.0                                         | 3.9                                        | 4.6                                    | -4.2                                               | 0.09 ± 0.02                                           | 0.28 ± 0.21                                            | 0.3                          | 0.1                          | 21.2          | 25.7        |
| S8           | Mzima River                    | 2/09/2011  | 7.6                                         | 570.7                                      | 4.5                                    | -4.4                                               | 0.25 ± 0.01                                           | 1.26 ± 0.48                                            | 3.8                          | 0.6                          | 13.0          | 16.9        |
| S9           | Ziwani River                   | 3/09/2011  | 7.0                                         | 79.0                                       | 6.2                                    | -4.8                                               | 1.10 ± 0.46                                           | 2.35 ± 0.85                                            | 61.3                         | 1.3                          | 9.5           | 2.2         |
| S10          | Tsavo River (Tsavo West)       | 3/09/2011  | 7.0                                         | 194.8                                      | 5.8                                    | -5.3                                               | 0.27 ± 0.13                                           | 5.63 ± 3.06                                            | 38.3                         | 1.5                          | 11.0          | 3.9         |
| S12          | Tsavo River @ Mombassa Rd      | 4/09/2011  | 8.9                                         | 47.3                                       | 8.8                                    | -4.4                                               | 1.37 ± 0.07                                           | 2.36 ± 0.87                                            | 102.3                        | 3.0                          | 10.9          | 2.9         |

Supplementary Table 2: Overview of surface water temperature, dissolved O<sub>2</sub>, pH, conductivity, total alkalinity (TA), NH<sub>4</sub><sup>+</sup>, NO<sub>3</sub><sup>-</sup>, dissolved N<sub>2</sub>O, dissolved CH<sub>4</sub>, δ<sup>15</sup>N<sub>PN</sub>, δ<sup>18</sup>O<sub>H<sub>2</sub>O</sub>, pelagic PP, community R, TSM, POC, POC:PN and %POC for sampling sites during the short rain season (Oct.-Dec.: OND) sampling campaign in the Athi-Galana-Sabaki catchment (note: *d.l.*= below detection limit; *n.m.*= not measured).

| #            | Site Name                        | Date       | Latitude<br>(decimal) | Longitude<br>(decimal) | Altitude<br>(m) | t°<br>(°C) | O <sub>2</sub><br>(%) | pH<br>(NBS) | Conductivity<br>(μS cm <sup>-1</sup> ) | TA<br>(mmol kg <sup>-1</sup> ) | NH <sub>4</sub> <sup>+</sup><br>(μmol L <sup>-1</sup> ) | NO <sub>3</sub> <sup>-</sup><br>(μmol L <sup>-1</sup> ) |
|--------------|----------------------------------|------------|-----------------------|------------------------|-----------------|------------|-----------------------|-------------|----------------------------------------|--------------------------------|---------------------------------------------------------|---------------------------------------------------------|
| Main Channel |                                  |            |                       |                        |                 |            |                       |             |                                        |                                |                                                         |                                                         |
| S1           | Athi River @ Fourteen Falls      | 1/11/2011  | -1.0776               | 37.2525                | 1410            | 21.5       | 56.0                  | 7.48        | 353                                    | 1.53                           | 309.7                                                   | 120.2                                                   |
| S2           | Athi River @ Yatta               | 1/11/2011  | -1.2335               | 37.4660                | 1182            | 24.1       | 70.4                  | 7.26        | 362                                    | 1.51                           | 78.8                                                    | 432.4                                                   |
| S3           | Athi River @ Wamunyu             | 3/11/2011  | -1.4156               | 37.6469                | 1069            | 22.7       | 93.4                  | 7.56        | 301                                    | 1.11                           | 4.9                                                     | 318.0                                                   |
| S4           | Athi River @ Kavumbu             | 5/11/2011  | -1.6146               | 37.7853                | 941             | 26.9       | 103.1                 | 8.27        | 343                                    | 1.48                           | 5.1                                                     | 393.4                                                   |
| S5           | Athi River @ Nzeveni             | 20/11/2011 | -1.9060               | 37.9067                | 823             | 24.5       | 101.3                 | 7.24        | 203                                    | 0.85                           | 1.9                                                     | 134.1                                                   |
| S6           | Athi River @ Kiaoni              | 19/11/2011 | -2.2011               | 38.0573                | 710             | 25.6       | 103.5                 | 7.81        | 307                                    | 1.10                           | 4.4                                                     | 299.0                                                   |
| S11          | Athi River @ Tsavo Safari Camp   | 17/11/2011 | -2.6697               | 38.3821                | 493             | 27.8       | 105.6                 | 8.03        | 432                                    | 3.18                           | 1.9                                                     | 216.0                                                   |
| S13          | Athi River @ Pattersons Lodge    | 17/11/2011 | -2.9425               | 38.4890                | 447             | 27.5       | 99.4                  | 7.33        | 418                                    | 1.52                           | 0.9                                                     | 193.3                                                   |
| S14          | Galana River @ Luggard Falls     | 12/11/2011 | -3.0403               | 38.6961                | 333             | 30.0       | 106.0                 | 7.96        | 321                                    | 1.58                           | 5.9                                                     | 178.6                                                   |
| S15          | Galana River @ Hippo Point       | 12/11/2011 | -3.0464               | 38.9055                | 232             | 31.9       | 106.4                 | 7.88        | 332                                    | 1.58                           | 4.4                                                     | 207.5                                                   |
| S16          | Galana River @ Sala              | 13/11/2011 | -3.0763               | 39.1699                | 171             | 28.5       | 101.0                 | 7.86        | 351                                    | 1.67                           | 9.2                                                     | 207.6                                                   |
| S17          | Galana River @ Kiboko Lodge      | 11/11/2011 | -3.0689               | 39.2944                | 140             | 27.7       | 102.3                 | 8.12        | 298                                    | 1.96                           | 2.3                                                     | 303.7                                                   |
| S18          | Galana River @ Chakahola         | 10/11/2011 | -3.1062               | 39.5539                | 76              | 29.7       | 89.3                  | 8.04        | 456                                    | 2.14                           | 3.0                                                     | 267.5                                                   |
| S19          | Galana River @ Kakoneni          | 10/11/2011 | -3.1429               | 39.8518                | 36              | 30.4       | 98.9                  | 8.11        | 473                                    | 2.19                           | 2.4                                                     | 436.8                                                   |
| S20          | Sabaki River                     | 9/11/2011  | -3.1443               | 40.1084                | 0               | 30.2       | 94.3                  | 8.06        | 569                                    | 2.50                           | 3.1                                                     | 537.6                                                   |
| Tributaries  |                                  |            |                       |                        |                 |            |                       |             |                                        |                                |                                                         |                                                         |
| S7           | Mzima Spring                     | 15/11/2011 | -2.9842               | 38.0231                | 693             | 24.6       | 100.5                 | 7.43        | 548                                    | 4.82                           | 0.4                                                     | 42.7                                                    |
| S8           | Mzima River                      | 15/11/2011 | -3.0155               | 38.0288                | 656             | 25.5       | 107.6                 | 8.22        | 520                                    | 4.58                           | 3.4                                                     | 40.3                                                    |
| S9           | Ziwani River                     | 16/11/2011 | -3.0256               | 38.0408                | 653             | 25.6       | 107.9                 | 8.38        | 365                                    | 2.35                           | 2.6                                                     | 67.8                                                    |
| S10          | Tsavo River (Tsavo West)         | 16/11/2011 | -3.0463               | 38.1038                | 620             | 23.5       | 91.4                  | 7.87        | 457                                    | 3.30                           | 1.3                                                     | 44.1                                                    |
| S12          | Tsavo River @ Mombassa Rd        | 14/11/2011 | -2.9946               | 38.4608                | 466             | 29.9       | 108.1                 | 8.57        | 625                                    | 5.04                           | 1.7                                                     | 54.6                                                    |
| S21          | Katingani River                  | 3/11/2011  | -1.5671               | 37.5488                | 1175            | 31.8       | 102.6                 | 7.51        | 145                                    | 0.53                           | 4.4                                                     | 62.5                                                    |
| S22          | Keite River @ Makueni            | 4/11/2011  | -1.7764               | 37.6167                | 1107            | 22.1       | 104.3                 | 7.69        | 262                                    | 0.74                           | 9.1                                                     | 51.2                                                    |
| S23          | Keite River (below Thwake River) | 4/11/2011  | -1.7756               | 37.7204                | 986             | 31.0       | 105.0                 | 7.93        | 256                                    | 0.89                           | 2.9                                                     | 89.4                                                    |
| S24          | Thwake River                     | 5/11/2011  | -1.6708               | 37.6615                | 1053            | 26.1       | 103.6                 | 8.21        | 369                                    | 1.55                           | 2.9                                                     | 66.1                                                    |
| S26          | Kikuw River                      | 19/11/2011 | -2.0852               | 37.7707                | 864             | 28.0       | 94.3                  | 7.61        | 212                                    | 1.02                           | 9.7                                                     | 54.2                                                    |

Supplementary Table 2 (cont.)

| #            | Site Name                        | Date       | N <sub>2</sub> O<br>(nmol L <sup>-1</sup> ) | CH <sub>4</sub><br>(nmol L <sup>-1</sup> ) | δ <sup>15</sup> N <sub>PN</sub><br>(‰) | δ <sup>18</sup> O <sub>H<sub>2</sub>O</sub><br>(‰) | Pelagic PP<br>(μmol L <sup>-1</sup> h <sup>-1</sup> ) | Community R<br>(μmol L <sup>-1</sup> h <sup>-1</sup> ) | TSM<br>(mg L <sup>-1</sup> ) | POC<br>(mg L <sup>-1</sup> ) | POC:PN<br>(-) | %POC<br>(-) |
|--------------|----------------------------------|------------|---------------------------------------------|--------------------------------------------|----------------------------------------|----------------------------------------------------|-------------------------------------------------------|--------------------------------------------------------|------------------------------|------------------------------|---------------|-------------|
| Main Channel |                                  |            |                                             |                                            |                                        |                                                    |                                                       |                                                        |                              |                              |               |             |
| S1           | Athi River @ Fourteen Falls      | 1/11/2011  | 83.0                                        | 4502.4                                     | 6.9                                    | -1.7                                               | 12.36 ± 1.16                                          | 3.96 ± 0.21                                            | 92.0                         | 8.5                          | 7.3           | 9.22        |
| S2           | Athi River @ Yatta               | 1/11/2011  | 84.4                                        | 323.8                                      | 11.4                                   | -3.0                                               | 6.33 ± 0.49                                           | 3.41 ± 0.15                                            | 51.7                         | 4.1                          | 7.9           | 7.85        |
| S3           | Athi River @ Wamunyu             | 3/11/2011  | 12.7                                        | 242.7                                      | 8.1                                    | -2.6                                               | 1.52 ± 0.21                                           | 1.75 ± 0.29                                            | 1953.0                       | 36.8                         | 8.0           | 1.88        |
| S4           | Athi River @ Kavumbu             | 5/11/2011  | 12.1                                        | 224.2                                      | 13.6                                   | -2.9                                               | 9.88 ± 0.13                                           | 1.64 ± 0.33                                            | 116.5                        | 5.9                          | 8.6           | 5.03        |
| S5           | Athi River @ Nzeveni             | 20/11/2011 | 9.9                                         | 474.0                                      | 7.4                                    | -3.0                                               | <i>d.l.</i>                                           | 2.04 ± 0.37                                            | 4844.0                       | 83.4                         | 9.2           | 1.72        |
| S6           | Athi River @ Kiaoni              | 19/11/2011 | 8.2                                         | 224.4                                      | 8.6                                    | -2.8                                               | 1.21 ± 0.21                                           | 0.76 ± 0.14                                            | 1025.9                       | 25.2                         | 9.5           | 2.46        |
| S11          | Athi River @ Tsavo Safari Camp   | 17/11/2011 | 8.5                                         | 86.8                                       | 5.3                                    | -2.5                                               | <i>d.l.</i>                                           | 1.80 ± 0.29                                            | 3512.0                       | 87.3                         | 8.5           | 2.48        |
| S13          | Athi River @ Pattersons Lodge    | 17/11/2011 | 8.6                                         | 240.1                                      | 7.0                                    | -2.3                                               | <i>d.l.</i>                                           | 1.25 ± 0.12                                            | 3040.0                       | 63.3                         | 8.9           | 2.08        |
| S14          | Galana River @ Luggard Falls     | 12/11/2011 | 8.5                                         | 27.5                                       | 7.6                                    | -3.6                                               | <i>d.l.</i>                                           | 1.65 ± 0.23                                            | 6604.3                       | 97.5                         | 9.1           | 1.48        |
| S15          | Galana River @ Hippo Point       | 12/11/2011 | 8.0                                         | 28.2                                       | 8.2                                    | -3.2                                               | <i>d.l.</i>                                           | 1.32 ± 0.46                                            | 8073.2                       | 119.9                        | 9.4           | 1.48        |
| S16          | Galana River @ Sala              | 13/11/2011 | 9.1                                         | 68.8                                       | 6.3                                    | -2.9                                               | <i>d.l.</i>                                           | 1.74 ± 0.50                                            | 8372.1                       | 90.8                         | 9.7           | 1.09        |
| S17          | Galana River @ Kiboko Lodge      | 11/11/2011 | 9.9                                         | 169.2                                      | 8.0                                    | -1.3                                               | <i>d.l.</i>                                           | 1.94 ± 0.43                                            | 6288.7                       | 98.8                         | 9.8           | 1.57        |
| S18          | Galana River @ Chakahola         | 10/11/2011 | 13.0                                        | 489.9                                      | <i>n.m.</i>                            | -2.8                                               | <i>d.l.</i>                                           | 2.87 ± 0.16                                            | <i>n.m.</i>                  | 76.3                         | 8.8           | <i>n.m.</i> |
| S19          | Galana River @ Kakoneni          | 10/11/2011 | 12.3                                        | 616.5                                      | 8.7                                    | -1.1                                               | 3.13 ± 0.23                                           | 1.57 ± 0.15                                            | 2826.9                       | 78.3                         | 11.5          | 2.77        |
| S20          | Sabaki River                     | 9/11/2011  | 15.8                                        | 371.8                                      | 7.9                                    | -1.3                                               | 7.18 ± 0.89                                           | 1.78 ± 0.31                                            | 1866.7                       | 28.0                         | 9.1           | 1.50        |
| Tributaries  |                                  |            |                                             |                                            |                                        |                                                    |                                                       |                                                        |                              |                              |               |             |
| S7           | Mzima Spring                     | 15/11/2011 | 8.2                                         | 5.4                                        | -1.1                                   | -3.2                                               | 0.03 ± 0.01                                           | 0.33 ± 0.15                                            | 0.4                          | 0.1                          | 20.2          | 19.26       |
| S8           | Mzima River                      | 15/11/2011 | 7.5                                         | 304.4                                      | 4.3                                    | -2.8                                               | 0.53 ± 0.03                                           | 0.56 ± 0.11                                            | 5.0                          | 0.5                          | 12.0          | 10.31       |
| S9           | Ziwani River                     | 16/11/2011 | 11.1                                        | 46.3                                       | 8.3                                    | -5.5                                               | <i>d.l.</i>                                           | 3.18 ± 0.28                                            | 25890.0                      | 282.1                        | 11.6          | 1.09        |
| S10          | Tsavo River (Tsavo West)         | 16/11/2011 | 9.1                                         | 1357.1                                     | 6.6                                    | -4.6                                               | <i>d.l.</i>                                           | 2.36 ± 0.19                                            | 11275.0                      | 219.6                        | 12.3          | 1.95        |
| S12          | Tsavo River @ Mombassa Rd        | 14/11/2011 | 14.2                                        | 39.1                                       | 9.9                                    | -2.1                                               | <i>d.l.</i>                                           | 1.38 ± 0.35                                            | 428.7                        | 7.4                          | 12.1          | 1.73        |
| S21          | Katingani River                  | 3/11/2011  | 6.6                                         | 9.0                                        | 5.0                                    | -2.1                                               | 1.14 ± 1.63                                           | 1.78 ± 0.17                                            | 900.0                        | 12.4                         | 9.0           | 1.38        |
| S22          | Keite River @ Makueni            | 4/11/2011  | 7.8                                         | 15.4                                       | 6.0                                    | -1.9                                               | 0.68 ± 0.04                                           | 1.15 ± 0.14                                            | 1453.8                       | 25.5                         | 10.9          | 1.75        |
| S23          | Keite River (below Thwake River) | 4/11/2011  | 6.8                                         | 20.6                                       | 6.6                                    | -1.2                                               | <i>d.l.</i>                                           | 1.77 ± 0.39                                            | 3151.3                       | 48.5                         | 10.6          | 1.54        |
| S24          | Thwake River                     | 5/11/2011  | 7.3                                         | 286.2                                      | 5.8                                    | -1.6                                               | 1.33 ± 0.01                                           | 0.72 ± 0.27                                            | 330.7                        | 9.7                          | 15.3          | 2.92        |
| S26          | Kikuw River                      | 19/11/2011 | 16.4                                        | 22.9                                       | 7.8                                    | -5.4                                               | <i>d.l.</i>                                           | 3.09 ± 0.29                                            | 28375.0                      | 446.8                        | 10.4          | 1.57        |

Supplementary Table 3: Overview of surface water temperature, dissolved O<sub>2</sub>, pH, conductivity, total alkalinity (TA), NH<sub>4</sub><sup>+</sup>, NO<sub>3</sub><sup>-</sup>, dissolved N<sub>2</sub>O, dissolved CH<sub>4</sub>, δ<sup>15</sup>N<sub>PN</sub>, δ<sup>18</sup>O<sub>H<sub>2</sub>O</sub>, pelagic PP, community R, TSM, POC, POC:PN and %POC for sampling sites during the long rain season (Mar.-May: MAM) sampling campaigns in the Athi-Galana-Sabaki catchment (note: *d.l.*= below detection limit; *n.m.*= not measured).

| #            | Site Name                        | Date       | Latitude<br>(decimal) | Longitude<br>(decimal) | Altitude<br>(m) | t°<br>(°C) | O <sub>2</sub><br>(%) | pH<br>(NBS) | Conductivity<br>(μS cm <sup>-1</sup> ) | TA<br>(mmol kg <sup>-1</sup> ) | NH <sub>4</sub> <sup>+</sup><br>(μmol L <sup>-1</sup> ) | NO <sub>3</sub> <sup>-</sup><br>(μmol L <sup>-1</sup> ) |
|--------------|----------------------------------|------------|-----------------------|------------------------|-----------------|------------|-----------------------|-------------|----------------------------------------|--------------------------------|---------------------------------------------------------|---------------------------------------------------------|
| Main Channel |                                  |            |                       |                        |                 |            |                       |             |                                        |                                |                                                         |                                                         |
| S1           | Athi River @ Fourteen Falls      | 25/04/2012 | -1.0776               | 37.2525                | 1410            | 19.8       | 66.8                  | 7.35        | 219                                    | 1.13                           | 123.0                                                   | 98.9                                                    |
| S2           | Athi River @ Yatta               | 25/04/2012 | -1.2335               | 37.4660                | 1182            | 21.2       | 102.9                 | 7.66        | 205                                    | 1.09                           | 61.6                                                    | 128.4                                                   |
| S3           | Athi River @ Wamunyu             | 24/04/2012 | -1.4156               | 37.6469                | 1069            | 21.4       | 98.1                  | 7.72        | 178                                    | 0.99                           | 36.5                                                    | 85.4                                                    |
| S4           | Athi River @ Kavumbu             | 27/04/2012 | -1.6146               | 37.7853                | 941             | 23.2       | 104.6                 | 7.27        | 226                                    | 1.09                           | 26.4                                                    | 156.8                                                   |
| S5           | Athi River @ Nzeveni             | 26/04/2012 | -1.9060               | 37.9067                | 823             | 23.2       | 108.0                 | 6.94        | 190                                    | 0.95                           | 12.9                                                    | 95.8                                                    |
| S6           | Athi River @ Kiaoni              | 21/04/2012 | -2.2011               | 38.0573                | 710             | 27.0       | 97.3                  | 7.35        | 443                                    | 1.67                           | 11.1                                                    | 398.8                                                   |
| S11          | Athi River @ Tsavo Safari Camp   | 19/04/2012 | -2.6697               | 38.3821                | 493             | 27.1       | 102.9                 | 7.95        | 404                                    | 1.60                           | 12.9                                                    | 138.6                                                   |
| S13          | Athi River @ Pattersons Lodge    | 19/04/2012 | -2.9425               | 38.4890                | 447             | 27.1       | 98.9                  | 7.15        | 278                                    | 1.26                           | 9.9                                                     | 126.5                                                   |
| S14          | Galana River @ Luggard Falls     | 29/04/2012 | -3.0403               | 38.6961                | 333             | 25.3       | 109.9                 | 7.92        | 301                                    | 1.50                           | 10.6                                                    | 146.4                                                   |
| S15          | Galana River @ Hippo Point       | 29/04/2012 | -3.0464               | 38.9055                | 232             | 26.9       | 111.0                 | 8.08        | 308                                    | 1.53                           | 15.5                                                    | 145.5                                                   |
| S16          | Galana River @ Sala              | 30/04/2012 | -3.0763               | 39.1699                | 171             | 26.4       | 105.3                 | 7.43        | 305                                    | 1.39                           | 22.1                                                    | 213.0                                                   |
| S17          | Galana River @ Kiboko Lodge      | 17/04/2012 | -3.0689               | 39.2944                | 140             | 31.0       | 99.9                  | 8.03        | 579                                    | 2.22                           | 15.1                                                    | 342.4                                                   |
| S18          | Galana River @ Chakahola         | 30/04/2012 | -3.1062               | 39.5539                | 76              | 27.0       | 102.3                 | 7.67        | 324                                    | 1.50                           | 17.0                                                    | 202.6                                                   |
| S20          | Sabaki River                     | 1/05/2012  | -3.1443               | 40.1084                | 0               | 28.9       | 73.1                  | 6.60        | 564                                    | 2.25                           | <i>n.m.</i>                                             | <i>n.m.</i>                                             |
| Tributaries  |                                  |            |                       |                        |                 |            |                       |             |                                        |                                |                                                         |                                                         |
| S7           | Mzima Spring                     | 18/04/2012 | -2.9842               | 38.0231                | 693             | 24.5       | 95.3                  | 7.50        | 551                                    | 4.84                           | 8.4                                                     | 41.6                                                    |
| S8           | Mzima River                      | 18/04/2012 | -3.0155               | 38.0288                | 656             | 25.3       | 103.5                 | 8.15        | 523                                    | 4.61                           | 9.0                                                     | 34.3                                                    |
| S9           | Ziwani River                     | 20/04/2012 | -3.0256               | 38.0408                | 653             | 24.3       | 103.5                 | 8.24        | 536                                    | 4.04                           | 24.9                                                    | 130.9                                                   |
| S10          | Tsavo River (Tsavo West)         | 20/04/2012 | -3.0463               | 38.1038                | 620             | 25.2       | 95.9                  | 8.31        | 513                                    | 4.00                           | 10.9                                                    | 110.4                                                   |
| S12          | Tsavo River @ Mombassa Rd        | 28/04/2012 | -2.9946               | 38.4608                | 466             | 24.9       | 109.1                 | 8.09        | 564                                    | 4.40                           | 33.0                                                    | 55.3                                                    |
| S21          | Katingani River                  | 24/04/2012 | -1.5671               | 37.5488                | 1175            | 24.4       | 107.1                 | 6.54        | 107                                    | 0.41                           | 8.9                                                     | 63.6                                                    |
| S22          | Keite River @ Makueni            | 23/04/2012 | -1.7764               | 37.6167                | 1107            | 20.9       | 106.3                 | 6.49        | 104                                    | 0.52                           | 39.2                                                    | 31.0                                                    |
| S23          | Keite River (below Thwake River) | 22/04/2012 | -1.7756               | 37.7204                | 986             | 28.2       | 106.2                 | 7.24        | 321                                    | 1.14                           | 11.9                                                    | 39.0                                                    |
| S26          | Kikuu River                      | 21/04/2012 | -2.0852               | 37.7707                | 864             | 36.0       | 105.8                 | 7.77        | 448                                    | 1.19                           | 11.2                                                    | 24.0                                                    |

Supplementary Table 3 (cont.)

| #            | Site Name                        | Date       | N <sub>2</sub> O<br>(nmol L <sup>-1</sup> ) | CH <sub>4</sub><br>(nmol L <sup>-1</sup> ) | δ <sup>15</sup> N <sub>PN</sub><br>(‰) | δ <sup>18</sup> O <sub>H<sub>2</sub>O</sub><br>(‰) | Pelagic PP<br>(μmol L <sup>-1</sup> h <sup>-1</sup> ) | Community R<br>(μmol L <sup>-1</sup> h <sup>-1</sup> ) | TSM<br>(mg L <sup>-1</sup> ) | POC<br>(mg L <sup>-1</sup> ) | POC:PN<br>(-) | %POC<br>(-) |
|--------------|----------------------------------|------------|---------------------------------------------|--------------------------------------------|----------------------------------------|----------------------------------------------------|-------------------------------------------------------|--------------------------------------------------------|------------------------------|------------------------------|---------------|-------------|
| Main Channel |                                  |            |                                             |                                            |                                        |                                                    |                                                       |                                                        |                              |                              |               |             |
| S1           | Athi River @ Fourteen Falls      | 25/04/2012 | 32.6                                        | 6729                                       | 12.5                                   | -7.9                                               | <i>d.l.</i>                                           | 3.21 ± 0.27                                            | 4275.6                       | 125.8                        | 10.1          | 2.9         |
| S2           | Athi River @ Yatta               | 25/04/2012 | 19.7                                        | 1149                                       | 8.6                                    | -8.1                                               | <i>d.l.</i>                                           | 4.50 ± 0.33                                            | 5321.7                       | 125.6                        | 14.6          | 2.4         |
| S3           | Athi River @ Wamunyu             | 24/04/2012 | 10.8                                        | 392                                        | 9.8                                    | -4.8                                               | <i>d.l.</i>                                           | 2.76 ± 0.33                                            | 5127.3                       | 101.2                        | 10.4          | 2.0         |
| S4           | Athi River @ Kavumbu             | 27/04/2012 | 9.9                                         | 216                                        | 5.0                                    | -5.6                                               | 33.37 ± 10.35                                         | 3.02 ± 0.22                                            | 2452.5                       | 62.3                         | 12.4          | 2.5         |
| S5           | Athi River @ Nzeveni             | 26/04/2012 | 11.0                                        | 134                                        | 5.3                                    | <i>n.m.</i>                                        | <i>d.l.</i>                                           | 3.57 ± 0.16                                            | 5490.2                       | 66.2                         | 12.4          | 1.2         |
| S6           | Athi River @ Kiaoni              | 21/04/2012 | 10.4                                        | 188                                        | 3.9                                    | -2.7                                               | 135.27 ± 18.17                                        | 2.19 ± 0.20                                            | 5595.4                       | 72.8                         | 18.4          | 1.3         |
| S11          | Athi River @ Tsavo Safari Camp   | 19/04/2012 | 8.2                                         | 33                                         | 15.7                                   | -4.6                                               | <i>d.l.</i>                                           | 2.17 ± 0.43                                            | 7047.5                       | 137.2                        | 8.8           | 1.9         |
| S13          | Athi River @ Pattersons Lodge    | 19/04/2012 | 8.2                                         | 177                                        | 5.3                                    | <i>n.m.</i>                                        | 39.04 ± 10.63                                         | 1.10 ± 0.26                                            | 3624.0                       | 56.1                         | 10.6          | 1.5         |
| S14          | Galana River @ Luggard Falls     | 29/04/2012 | 8.4                                         | 37                                         | 6.4                                    | -7.5                                               | <i>d.l.</i>                                           | 1.86 ± 0.29                                            | 3856.7                       | 68.1                         | 10.6          | 1.8         |
| S15          | Galana River @ Hippo Point       | 29/04/2012 | 7.9                                         | 18                                         | 7.7                                    | -4.1                                               | <i>d.l.</i>                                           | 1.35 ± 0.38                                            | 4860.0                       | 81.8                         | 10.6          | 1.7         |
| S16          | Galana River @ Sala              | 30/04/2012 | 8.0                                         | 91                                         | 6.4                                    | -7.3                                               | <i>d.l.</i>                                           | 1.07 ± 0.19                                            | 2914.3                       | 27.7                         | 10.8          | 2.4         |
| S17          | Galana River @ Kiboko Lodge      | 17/04/2012 | 8.9                                         | 59                                         | 15.5                                   | -2.6                                               | 56.02 ± 13.39                                         | 3.81 ± 0.44                                            | 8136.4                       | 81.5                         | 11.2          | 2.2         |
| S18          | Galana River @ Chakahola         | 30/04/2012 | 8.8                                         | 226                                        | 6.3                                    | -5.6                                               | 35.86 ± 7.83                                          | 1.39 ± 0.16                                            | 3750.6                       | 36.7                         | 13.7          | 2.3         |
| S20          | Sabaki River                     | 1/05/2012  | <i>n.m.</i>                                 | <i>n.m.</i>                                | 1.5                                    | -1.1                                               | <i>n.m.</i>                                           | <i>n.m.</i>                                            | 880.0                        | 15.1                         | 10.2          | 1.7         |
| Tributaries  |                                  |            |                                             |                                            |                                        |                                                    |                                                       |                                                        |                              |                              |               |             |
| S7           | Mzima Spring                     | 18/04/2012 | 8.9                                         | 2                                          | 0.0                                    | -3.4                                               | 0.48 ± 0.16                                           | 0.23 ± 0.18                                            | 0.4                          | 0.1                          | 16.8          | 21.0        |
| S8           | Mzima River                      | 18/04/2012 | 7.8                                         | 483                                        | 0.1                                    | -3.3                                               | 3.29 ± 2.10                                           | 0.28 ± 0.14                                            | 6.2                          | 1.3                          | 12.9          | 21.3        |
| S9           | Ziwani River                     | 20/04/2012 | 7.8                                         | 15                                         | 19.1                                   | <i>n.m.</i>                                        | 30.29 ± 4.24                                          | 2.79 ± 0.31                                            | 25060.0                      | 264.4                        | 13.8          | 1.1         |
| S10          | Tsavo River (Tsavo West)         | 20/04/2012 | 8.0                                         | 224                                        | 14.9                                   | -6.9                                               | <i>d.l.</i>                                           | 2.16 ± 0.17                                            | 17593.3                      | 183.5                        | 12.3          | 1.0         |
| S12          | Tsavo River @ Mombassa Rd        | 28/04/2012 | 9.4                                         | 42                                         | 4.3                                    | <i>n.m.</i>                                        | 29.35 ± 4.02                                          | 1.03 ± 0.20                                            | 4789.7                       | 59.8                         | 14.1          | 1.2         |
| S21          | Katingani River                  | 24/04/2012 | 7.2                                         | 45                                         | 1.7                                    | <i>n.m.</i>                                        | 49.51 ± 10.55                                         | 0.49 ± 0.13                                            | 983.0                        | 18.0                         | 10.5          | 1.8         |
| S22          | Keite River @ Makueni            | 23/04/2012 | 8.6                                         | 38                                         | 19.8                                   | -5.1                                               | <i>d.l.</i>                                           | 2.56 ± 0.19                                            | 16502.6                      | 214.3                        | 10.8          | 1.3         |
| S23          | Keite River (below Thwake River) | 22/04/2012 | 6.3                                         | 34                                         | 2.9                                    | <i>n.m.</i>                                        | 106.27 ± 0.91                                         | 1.06 ± 0.14                                            | 1798.0                       | 32.7                         | 11.3          | 1.8         |
| S26          | Kikuw River                      | 21/04/2012 | 6.0                                         | 377                                        | 2.6                                    | -3.2                                               | 81.47 ± 13.00                                         | 0.54 ± 0.70                                            | 1085.9                       | 19.5                         | 7.6           | 1.8         |

Supplementary Table 4: Overview of  $\delta^{15}\text{N}_{\text{PN}}$  and  $\delta^{18}\text{O}_{\text{H}_2\text{O}}$  at the Sabaki bi-weekly monitoring site (S20; Latitude: -3.1443, Longitude: 40.1084, Altitude: 0 m.a.s.l.) for a one year sampling period.

| Date       | $\delta^{15}\text{N}_{\text{PN}}$<br>(‰) | $\delta^{18}\text{O}_{\text{H}_2\text{O}}$<br>(‰) |
|------------|------------------------------------------|---------------------------------------------------|
| 24/09/2011 | 14.0                                     | 3.0                                               |
| 8/10/2011  | 14.3                                     | 0.7                                               |
| 22/10/2011 | 14.7                                     | 0.3                                               |
| 4/11/2011  | 11.0                                     | -0.8                                              |
| 19/11/2011 | 9.3                                      | -1.2                                              |
| 3/12/2011  | 8.3                                      | -3.6                                              |
| 17/12/2011 | 8.4                                      | -2.2                                              |
| 29/12/2011 | 8.6                                      | -1.3                                              |
| 17/01/2012 | 7.4                                      | 2.5                                               |
| 3/02/2012  | 12.8                                     | 1.3                                               |
| 18/02/2012 | 10.2                                     | 1.4                                               |
| 3/03/2012  | 11.8                                     | 1.6                                               |
| 18/03/2012 | 10.7                                     | 2.9                                               |
| 30/03/2012 | 10.8                                     | -0.3                                              |
| 14/04/2012 | 9.6                                      | -0.8                                              |
| 1/05/2012  | 8.5                                      | -1.1                                              |
| 15/05/2012 | 4.6                                      | 2.3                                               |
| 30/05/2012 | 6.0                                      | -2.5                                              |
| 14/06/2012 | 12.6                                     | -2.7                                              |
| 26/06/2012 | 2.2                                      | -2.1                                              |
| 10/07/2012 | 6.6                                      | -1.7                                              |
| 24/07/2012 | 4.3                                      | -2.6                                              |
| 6/08/2012  | 8.4                                      | -2.4                                              |
| 20/08/2012 | -3.1                                     | -2.6                                              |
| 2/09/2012  | 11.6                                     | 1.7                                               |
| 16/09/2012 | 3.6                                      | -0.2                                              |
