# Supplementary material for: Dynamic seasonal nitrogen cycling in response to anthropogenic N loading in a tropical catchment, Athi–Galana–Sabaki River, Kenya
Source: Copernicus journal article supplement (doi:10.5194/bg-11-443-2014), 2014-01-29
Supplement: Supplementary file 2 [file Marwick et al. (2013) Supplementary File 2.pdf › Marwick et al. (2013) Supplementary File 2.pdf]

T. R. Marwick et al. (2013) Dynamic Seasonal Nitrogen Cycling in Response to Anthropogenic N-Loading in a Tropical Catchment, Athi-Galana-Sabaki River, Kenya.

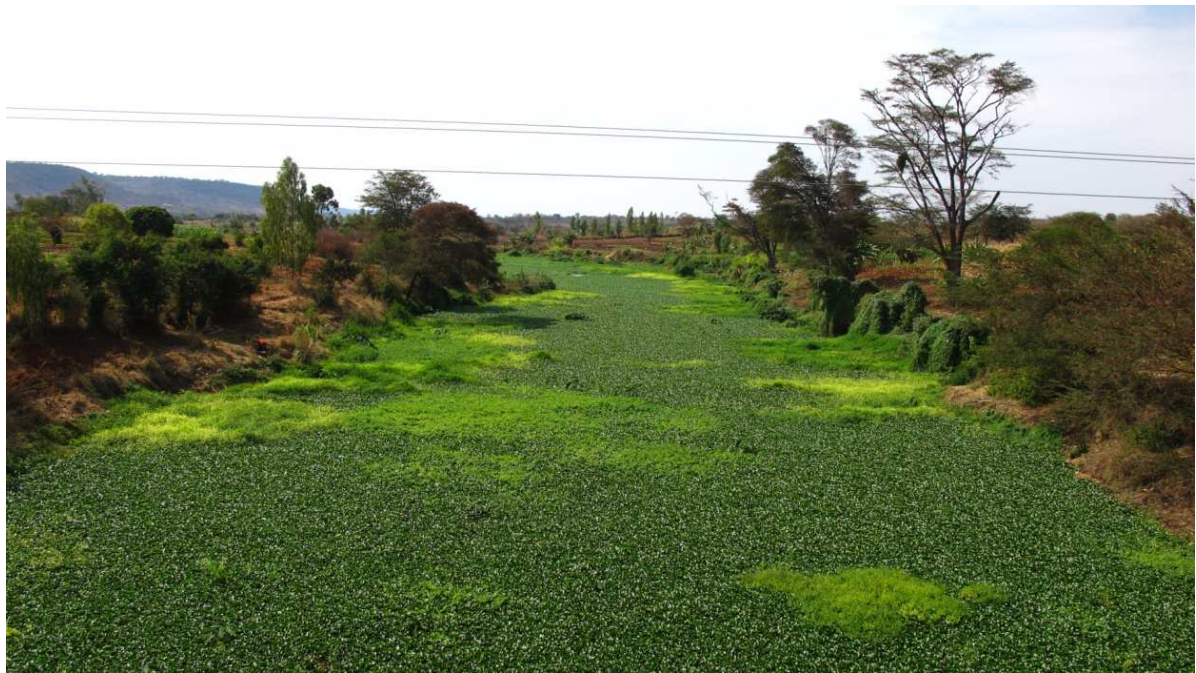

Figure S1: Downstream view in the vicinity of site S2 where macrophytes (predominantly *Eichhornia crassipes*) form a dense mat over the Athi River during the dry season. This phenomenon was not observed in other localities, nor during the wet seasons at this locality.

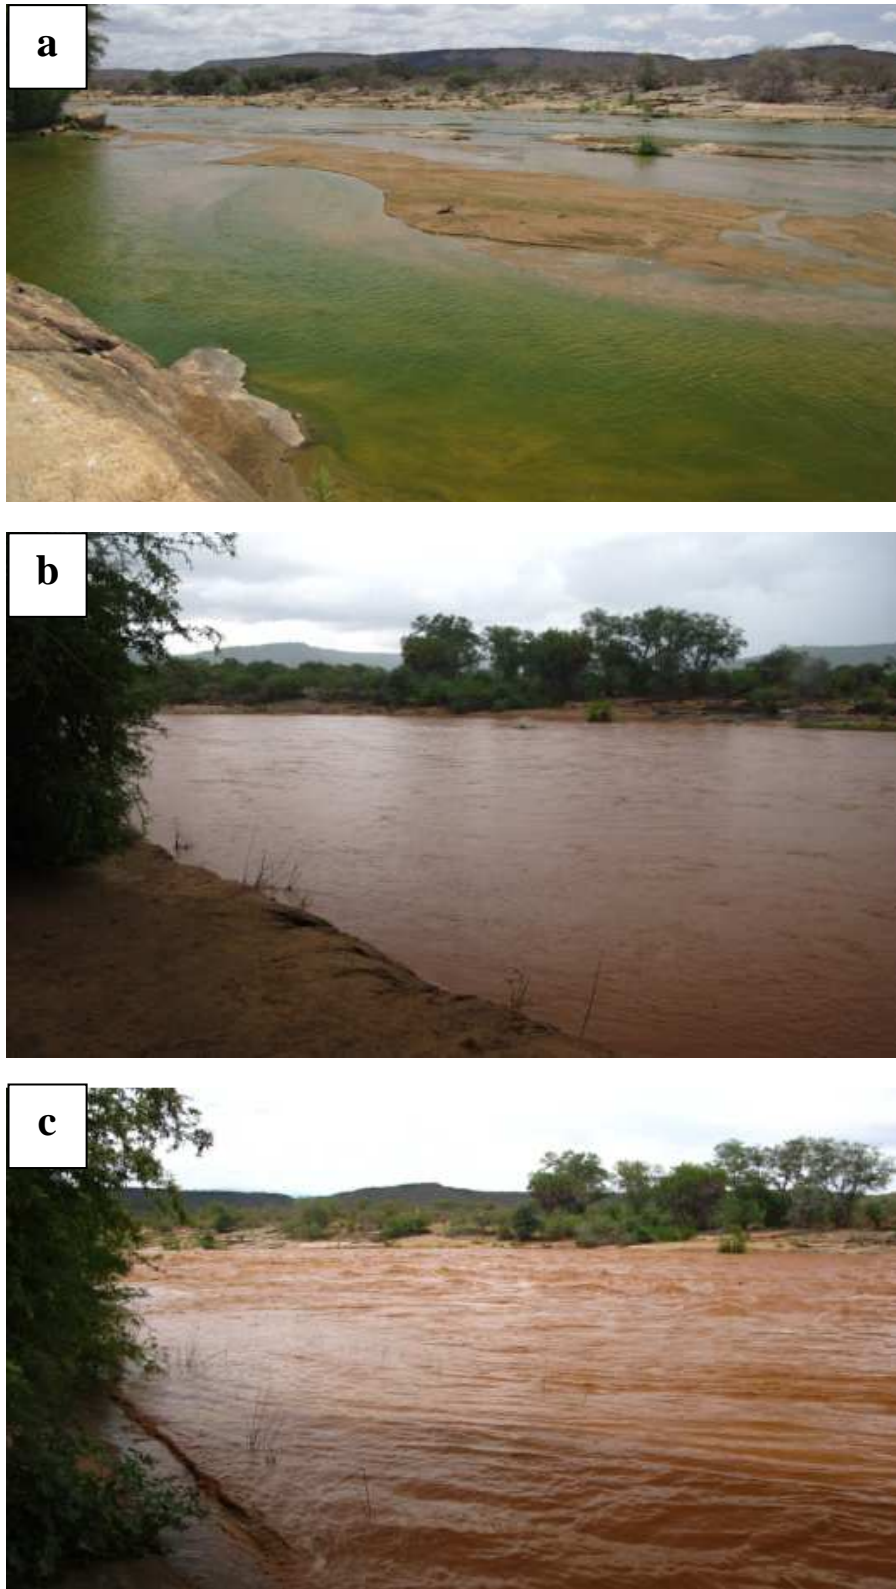

Figure S2: Logistical constraints prevented chlorophyll a sampling, though it is evident that pelagic primary production was considerably greater during the (a) dry season than during either the (b) short or (c) long rain seasons (site S13).
